# Supplementary material for: The influence of primary care quality on nursing home admissions in a multimorbid population with and without dementia in Germany: A retrospective cohort study using health insurance claims data
Source: Research Square preprint supplement (doi:10.21203/rs.3.rs-763398/v1), 2021-08-17

Baseline results of quality indicators of primary care for chronic conditions for multimorbid people with and without dementia, 2007 1<sup>st</sup> quarter

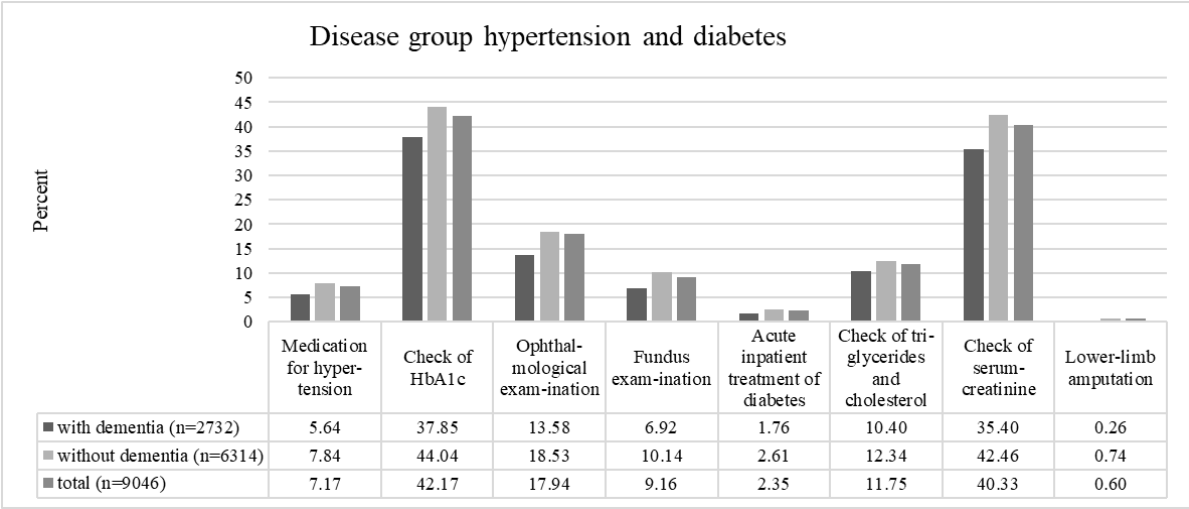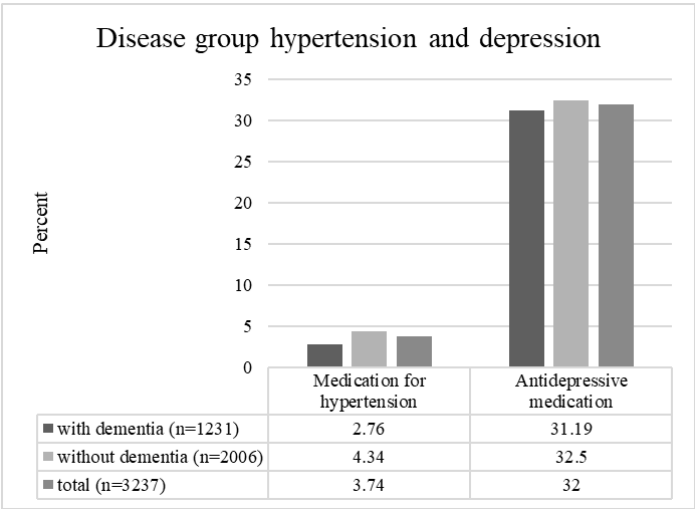

Baseline results of quality indicators of primary care for chronic conditions for multimorbid people with and without dementia, 2007 1<sup>st</sup> quarter

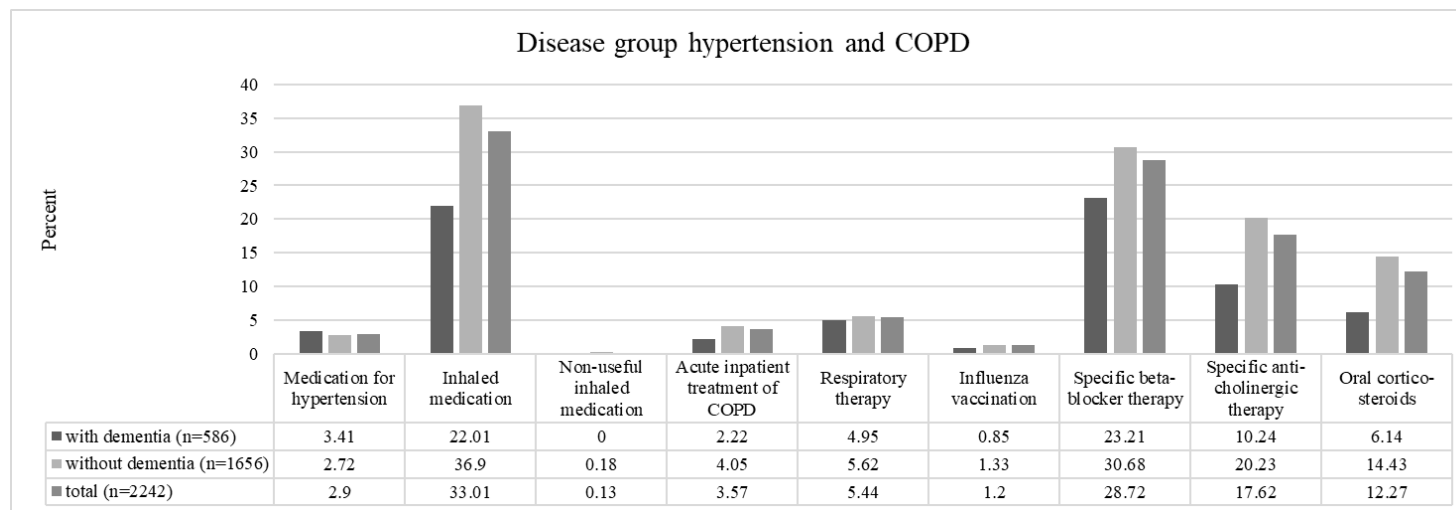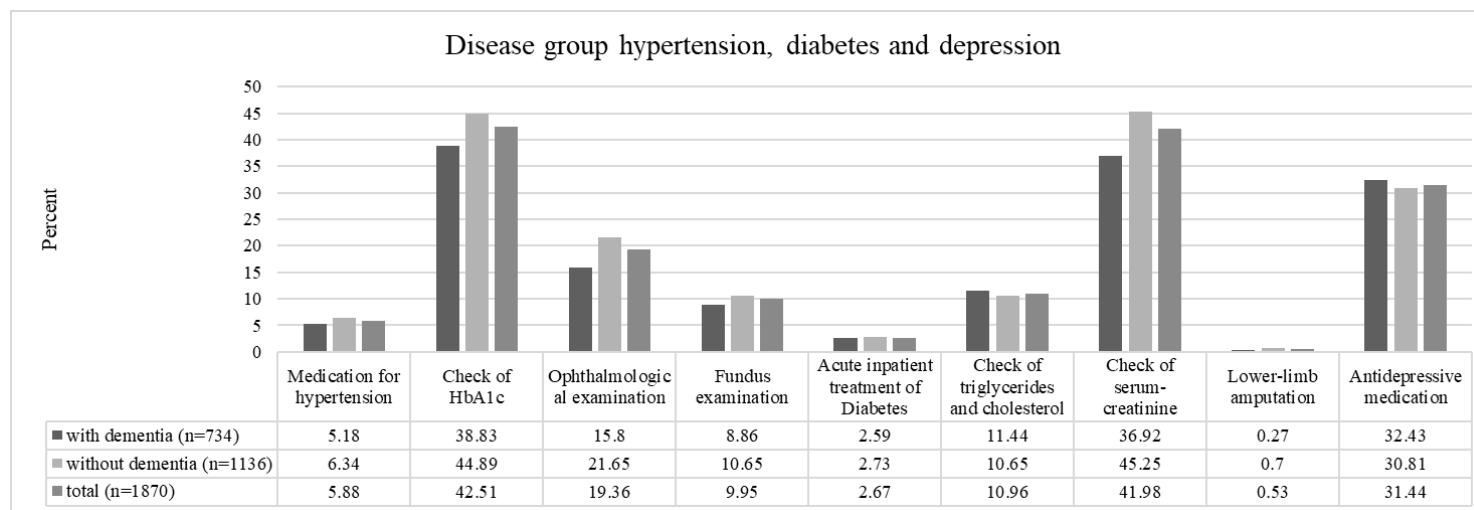

Baseline results of quality indicators of primary care for chronic conditions for multimorbid people with and without dementia, 2007 1<sup>st</sup> quarter

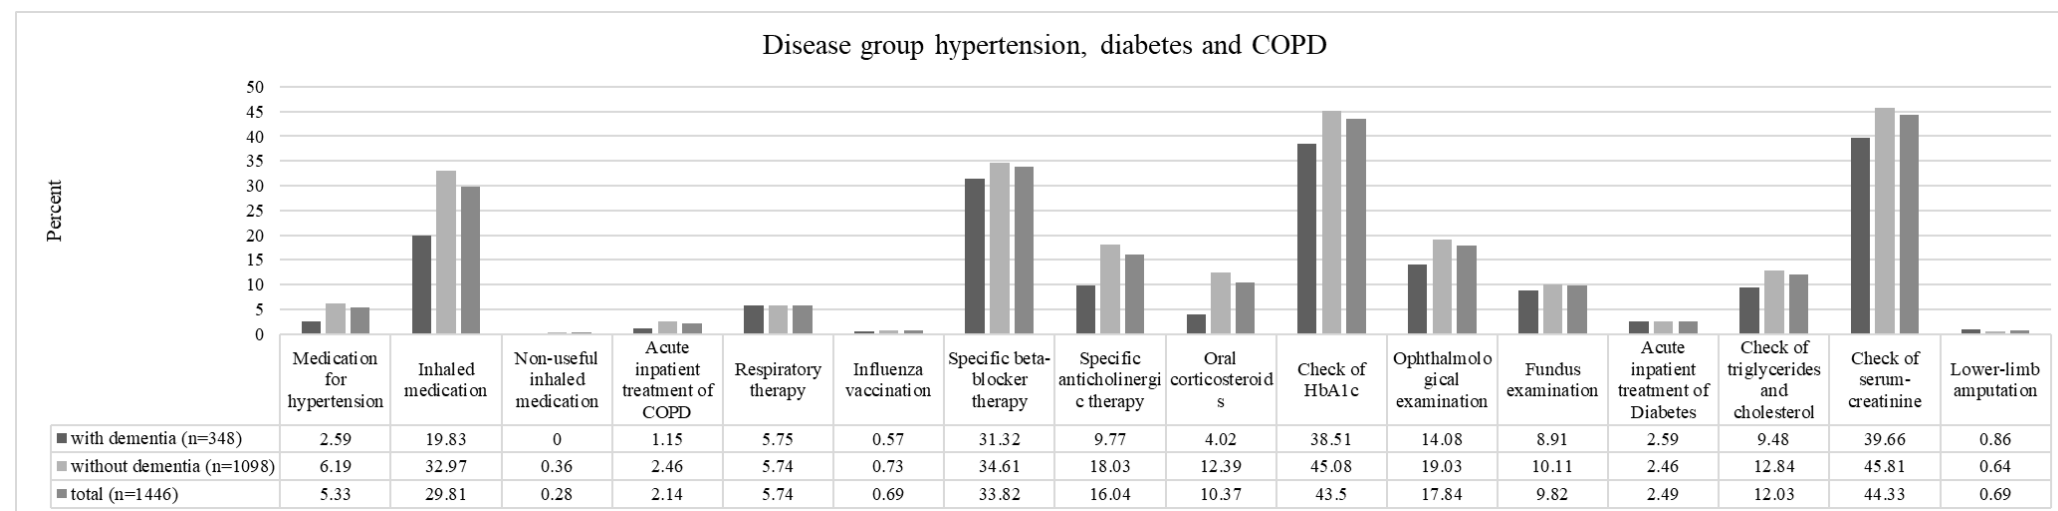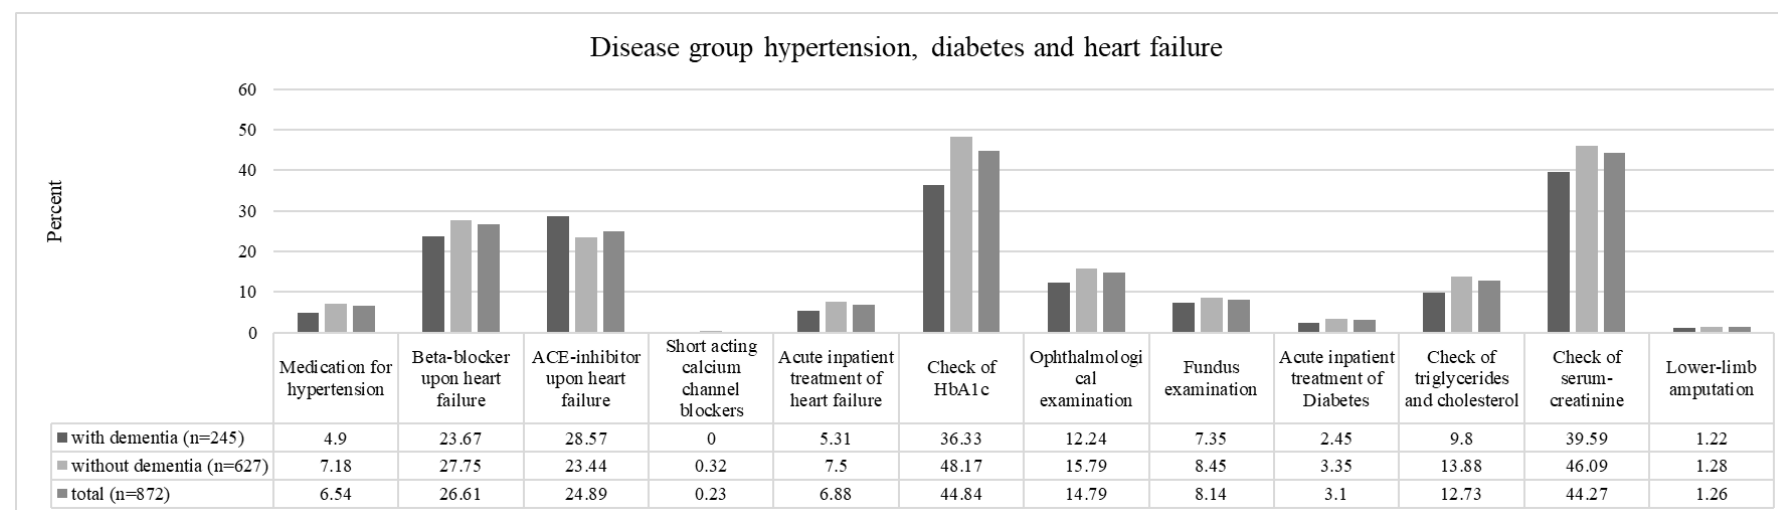

Supplement: Supplementary file 1 [file 3a4f93b7e08ee2b40dc03a81.pdf]
